# Supplementary material for: Role of SpO2/FiO2 Ratio and ROX Index in Predicting Early Invasive Mechanical Ventilation in COVID-19. A Pragmatic, Retrospective, Multi-Center Study
Source: MDPI journal article supplement (doi:10.3390/biomedicines9081036), 2021-08-18
Supplement: s1 [file s1]

## Supplementary material

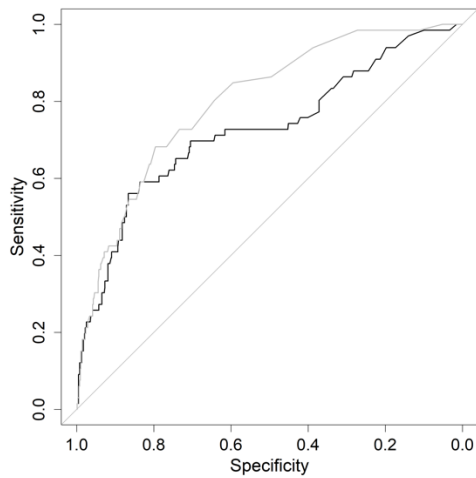

**Supplementary Figure S1.** Area under the receiver operating characteristic (ROC) curve (AUC) for SpO<sub>2</sub>/FiO<sub>2</sub> ratio in grey and ROX index in black.

| <b>SpO<sub>2</sub>/FiO<sub>2</sub> ratio</b> | specificity | sensitivity | positive predictive value | negative predictive value | positive likelihood ratio | negative likelihood ratio |
|----------------------------------------------|-------------|-------------|---------------------------|---------------------------|---------------------------|---------------------------|
| Estimate                                     | 89,49       | 26,80       | 34,10                     | 92,01                     | 4,92                      | 0,77                      |
| Lower bound                                  | 87,65       | 24,24       | 33,04                     | 91,79                     | 4,73                      | 0,75                      |
| Upper bound                                  | 91,32       | 29,36       | 35,16                     | 92,22                     | 5,12                      | 0,80                      |
| Standard deviation                           | 0,93        | 1,30        | 0,54                      | 0,11                      | 0,10                      | 0,01                      |
|                                              |             |             |                           |                           |                           |                           |
| <b>ROX index</b>                             | specificity | sensitivity | positive predictive value | negative predictive value | positive likelihood ratio | negative likelihood ratio |
| Estimate                                     | 29,79       | 79,80       | 15,86                     | 97,38                     | 1,86                      | 0,25                      |
| Lower bound                                  | 21,63       | 73,34       | 13,80                     | 96,66                     | 1,52                      | 0,18                      |
| Upper bound                                  | 37,94       | 86,26       | 17,93                     | 98,10                     | 2,19                      | 0,32                      |
| Standard deviation                           | 4,11        | 3,25        | 1,04                      | 0,36                      | 0,17                      | 0,03                      |

**Supplementary Table S1.** Further details of the predictive capacity of SpO<sub>2</sub>/FiO<sub>2</sub> ratio and ROX index
